# Supplementary material for: Simultaneous enhancement of fluorescence intensity, thermometric sensitivity and SNR of upconversion thermometers via optical field localization
Source: Royal Society of Chemistry journal article supplement (doi:10.1039/d1tc05838j), 2022-01-01
Supplement: d1tc05838j1.pdf [file d1tc05838j1.pdf]

## Supporting Information

### Simultaneous enhancement of fluorescence intensity, thermometry sensitivity and SNR of upconversion thermometers via optical field localization

Guoran Huang<sup>#a</sup>, Xiaofeng Wu<sup>#c</sup>, Shiping Zhan<sup>\*a,b</sup> and Yunxin Liu<sup>\*a,b,c</sup>

a. Department of Physics and Electronic Science, Hunan University of Science and Technology, Xiangtan, 411201, China

b. Hunan Province Key Laboratory of Intelligent Sensors and Advanced Sensor Materials, Xiangtan, 411201, China.

c. School of Computer and Information Engineering, Hunan University of Technology and Business, Changsha 410205, China

\*E-mail: (Shiping Zhan: spzhan86@163.com, and Yunxin Liu: lyunxin@163.com)

# Contributed equally

**Preparation of NaGdF<sub>4</sub>:Yb,Er@NaYF<sub>4</sub> core shell UCNPs:** Rare earth chloride aqueous solution was prepared by dissolving rare earth chlorides in deionized water. The prepared LnCl<sub>3</sub> (LnCl<sub>3</sub>=80% Gd, 18% Yb, 2% Er) aqueous solution, 2 mL OA and 2 mL ODE were added to a 50 mL 2-necked flask with magnetic stirring, and then heated to 180°C. Under nitrogen protection, this solution was held for 80 min to turn the reaction system into a clear liquid. After the temperature cooled down to 60°C, the methanol solution of NaOH and NH<sub>4</sub>F was added, keeping the reaction continuously stirred at 60°C for 30 min. The reaction temperature was raised to 300°C and maintained for 80 min under the protection of nitrogen. Finally, the reaction was cooled to room temperature and the product was collected by centrifugation, and washed with cyclohexane, ethanol and deionized water for several times, finally dispersed in methanol for later use.

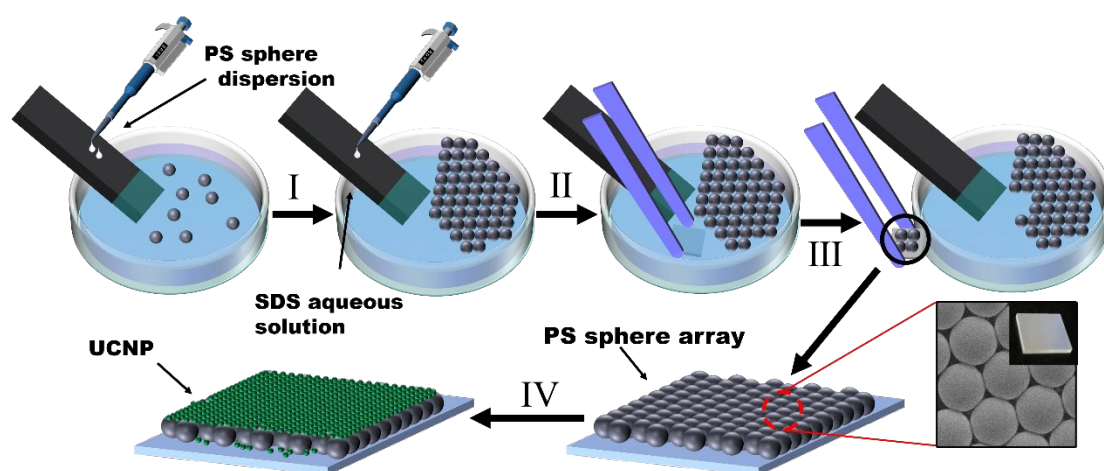

**Fig. S1** Fabrication process of the photonic crystal. I: Formation process of the Monolayer Photonic Crystals at the air/water interface. II and III: Transfer Photonic Crystals to the glass sheet. The enlarged image is SEM image, and the top right inset is the photo of photonic crystal. IV: The attachment of UCNPs.

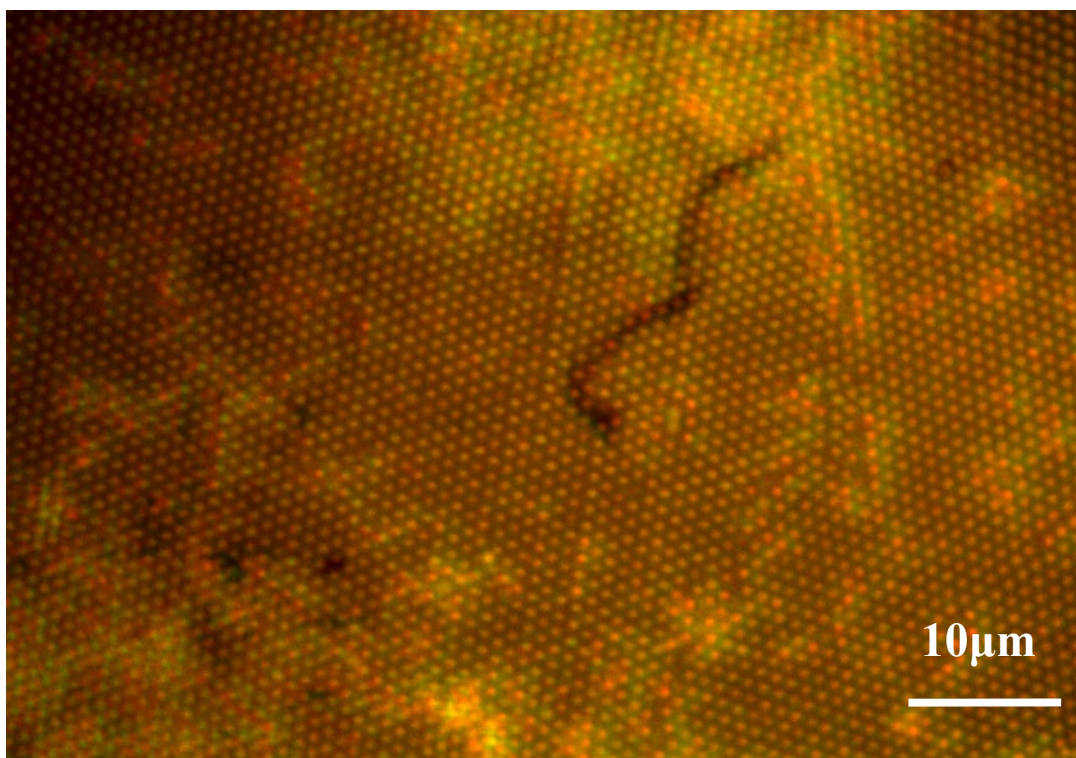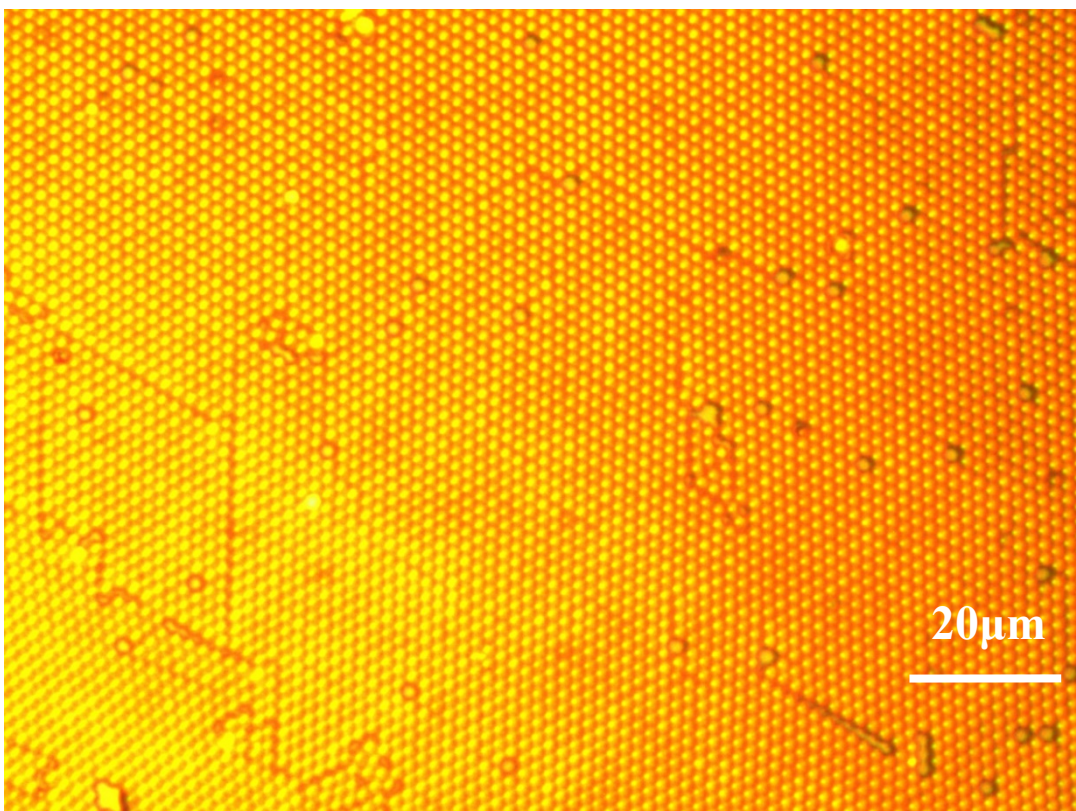

**Fig. S2** The microscope photos of (a)  $1\mu\text{m}$  (1000 folds) and (b)  $2\mu\text{m}$  (400 folds).

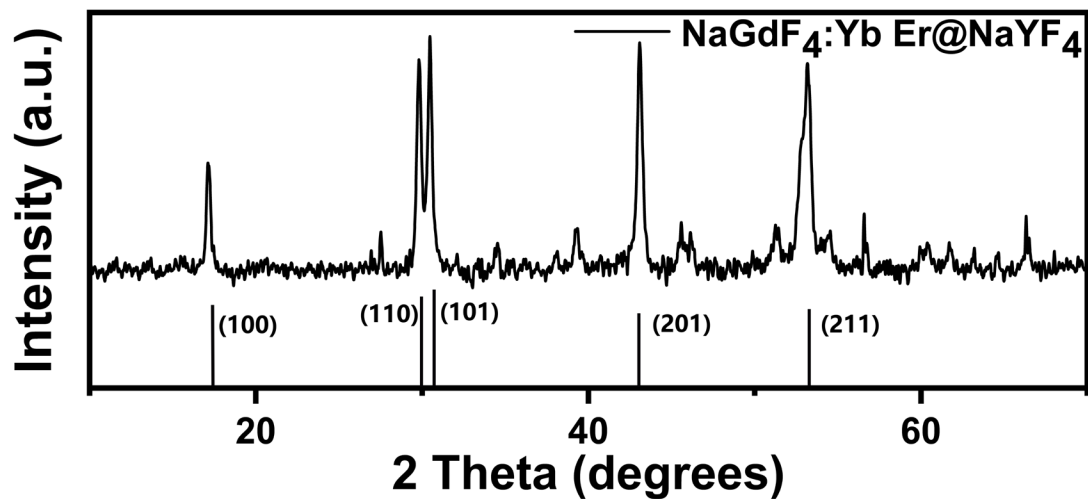

Fig. S3 The XRD spectra of the UCNPs.

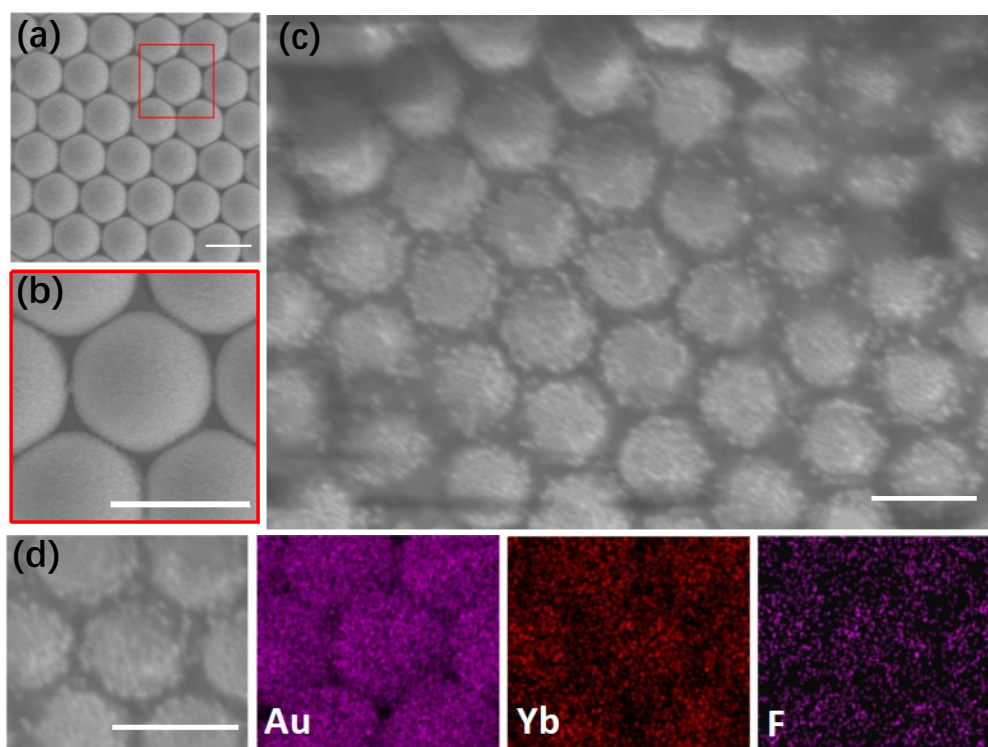

Fig. S4 (a) and (b) are the SEM image of the 2D PC@Au film structure. (c) The SEM image of the 2D PC@Au film@UCNPs structure. (d) The EDS analysis picture the of Au, Yb and F. The scale bar is 1 $\mu$ m.



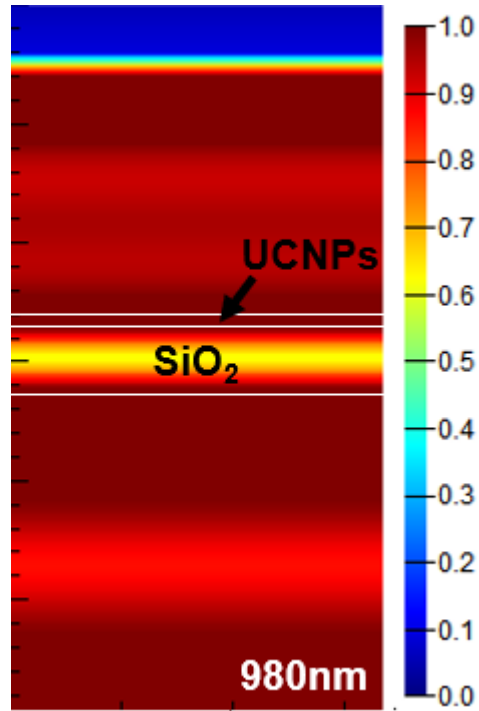

**Fig. S5** FDTD simulation of the Electrical field distribution  $|E/E_0|$  of 980 nm NIR for the reference group.

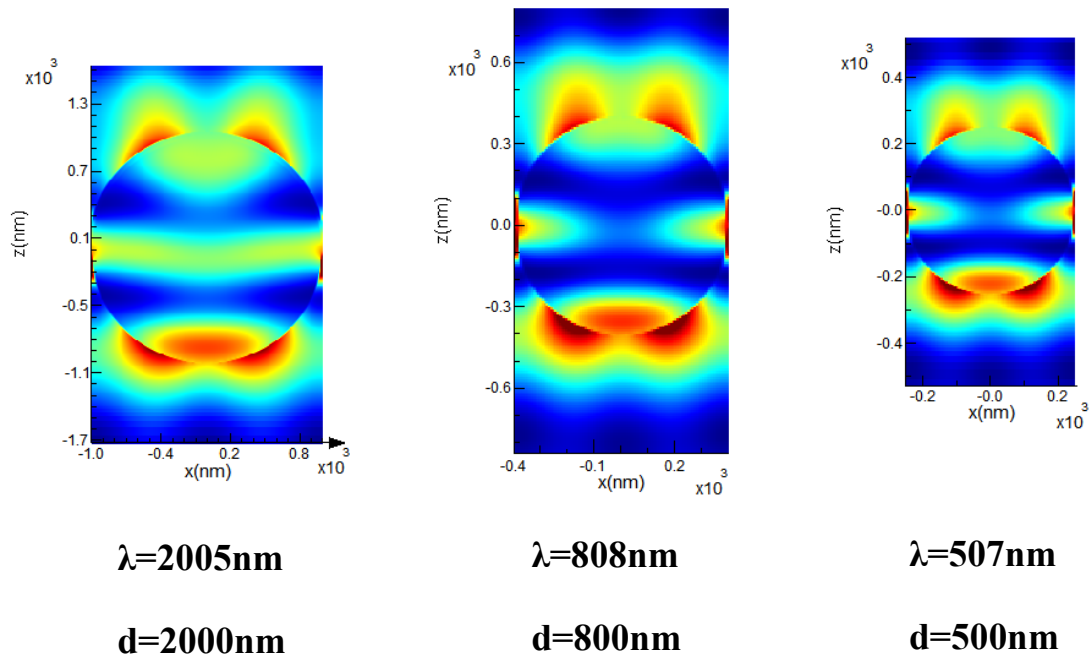

**Fig. S6** FDTD simulation of the Electrical field distribution  $|E/E_0|$  of 2005nm, 808nm and 505nm incident light on the PS spheres with diameters of 500nm, 800nm and 2000nm, respectively.

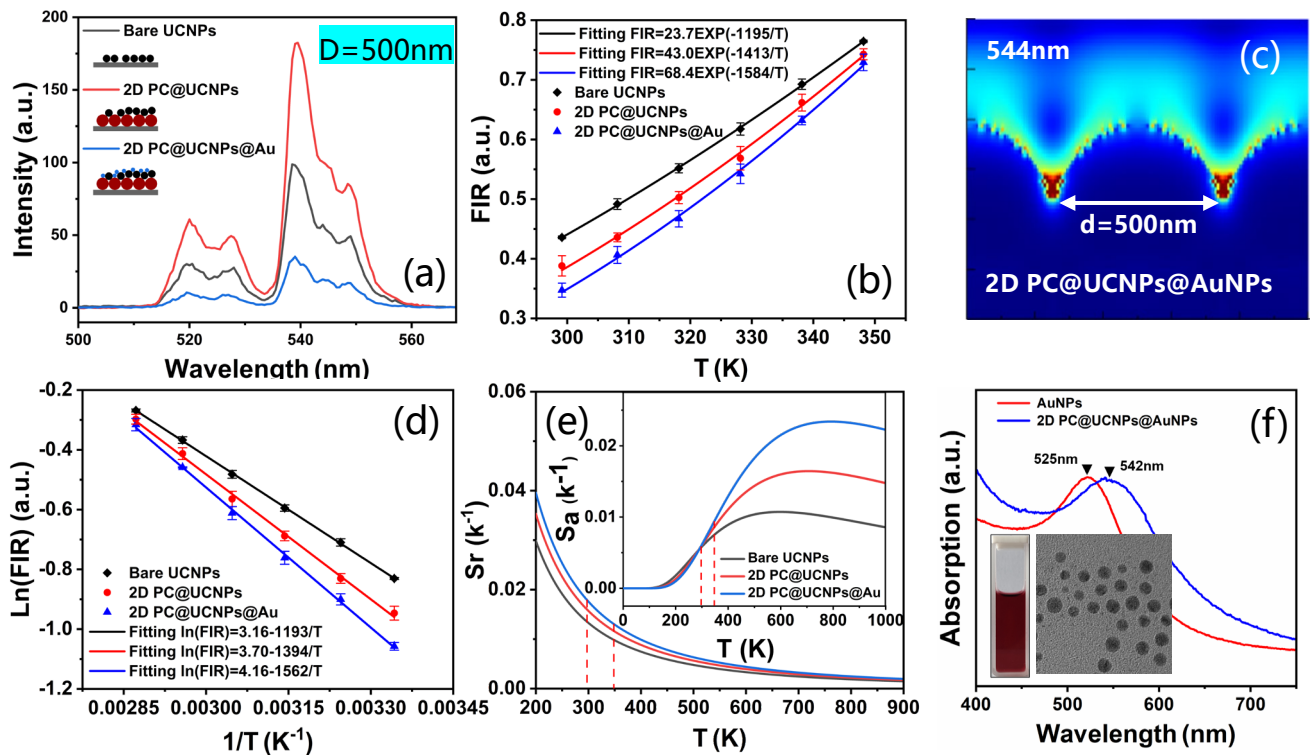

**Fig. S7** Temperature sensing performance of the 500nm PC@UCNPs composite. (a) Fluorescence intensity of the three structures. (b) FIR520/540 and (d)  $\text{Ln}(\text{FIR})$  temperature dependent experimental data points and fitted curves. (c) Simulated electrical field distribution of 544 nm in the composite structure. (e) Absolute and relative sensitivity of the three structures. (f) Absorption spectra of bare AuNPs and 2D PC@UCNPs@AuNPs.

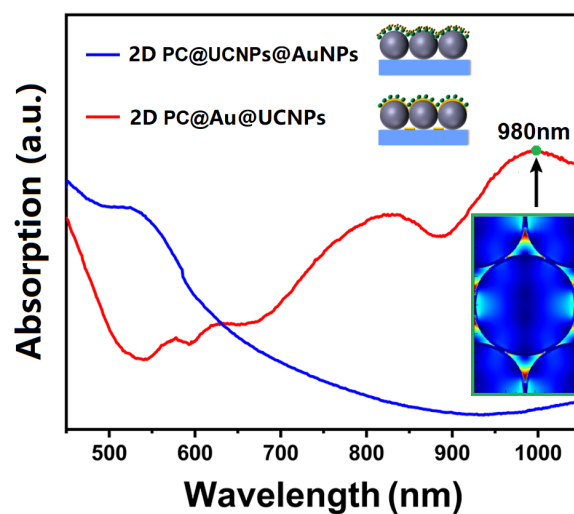

**Fig. S8** Absorption spectrum of  $1\mu\text{m}$  composite structure. The inset is a simulation of the field distribution of the 980 nm incident light.

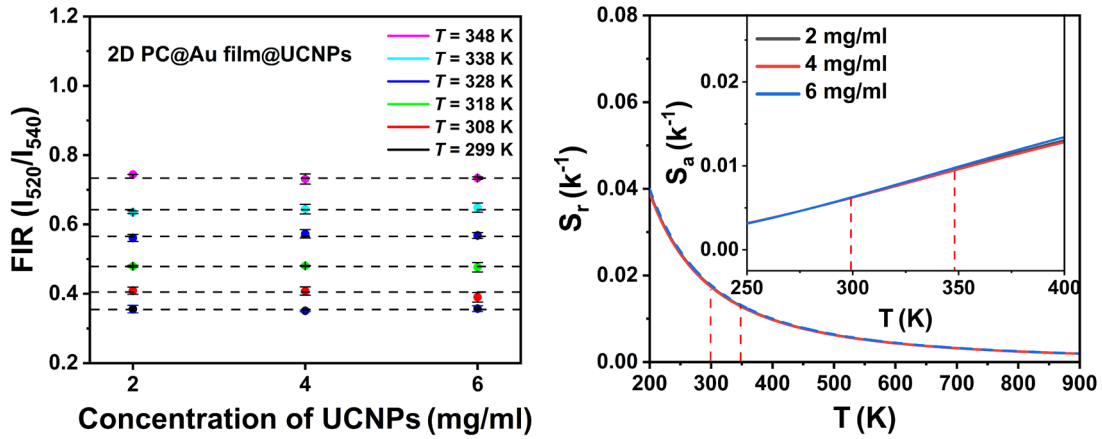

**Fig. S9** The measurement intensity ratio  $FIR(I_{520}/I_{540})$  at different UCNPs concentration in structure of 2D PC@Au film@UCNPs.

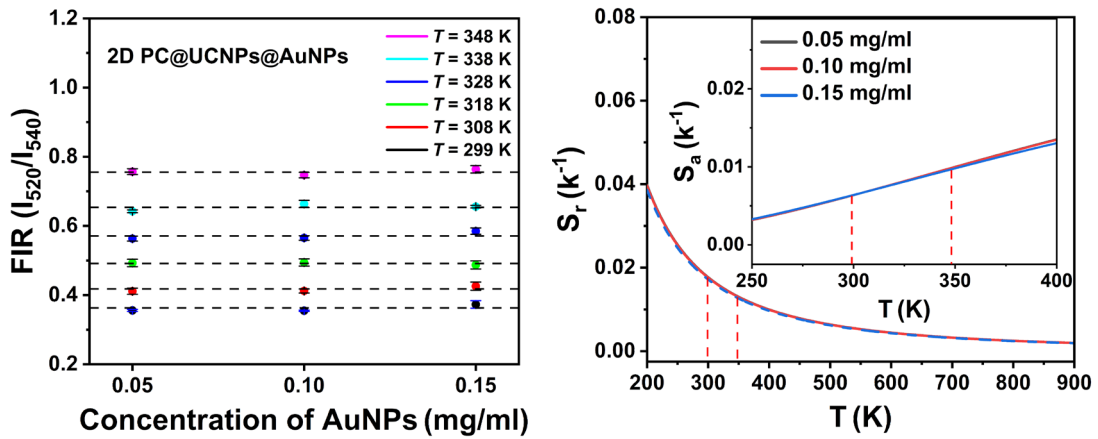

**Fig. S10** The measurement intensity ratio  $FIR(I_{520}/I_{540})$  at different AuNPs concentration in structure of 2D PC@UCNPs@AuNPs.

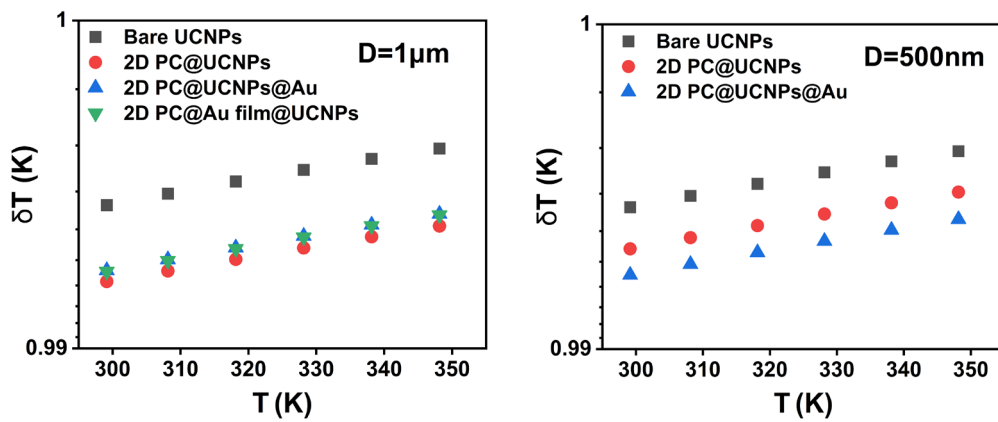

**Fig. S11** The thermal resolution ( $\delta T$ ) of the proposed UCNPs-based thermometers with various PS sphere diameters.

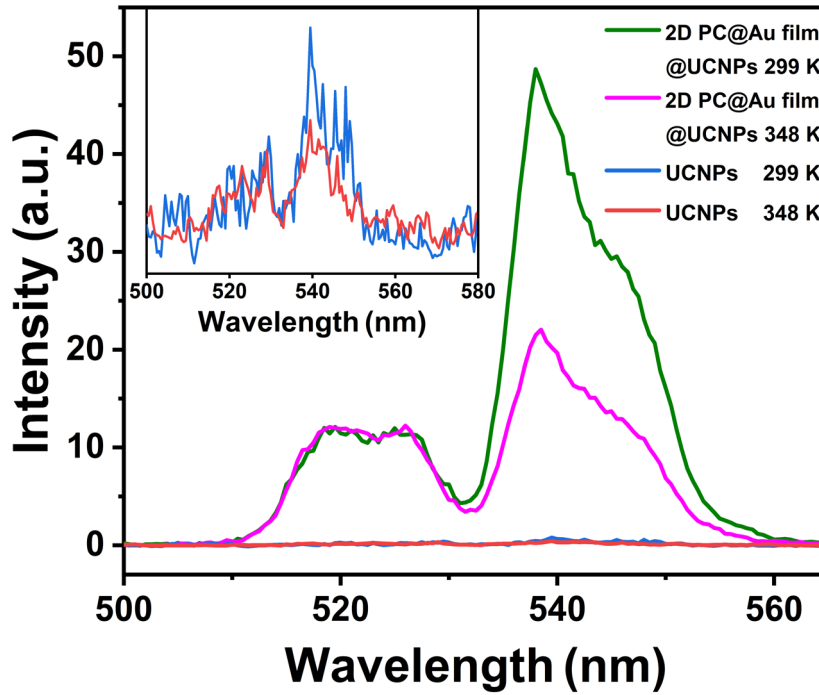

Fig. S12 The PL spectra of bare UCNP and 2D@Au film@UCNP under the weak 980nm NIR excitation power of 50mW.

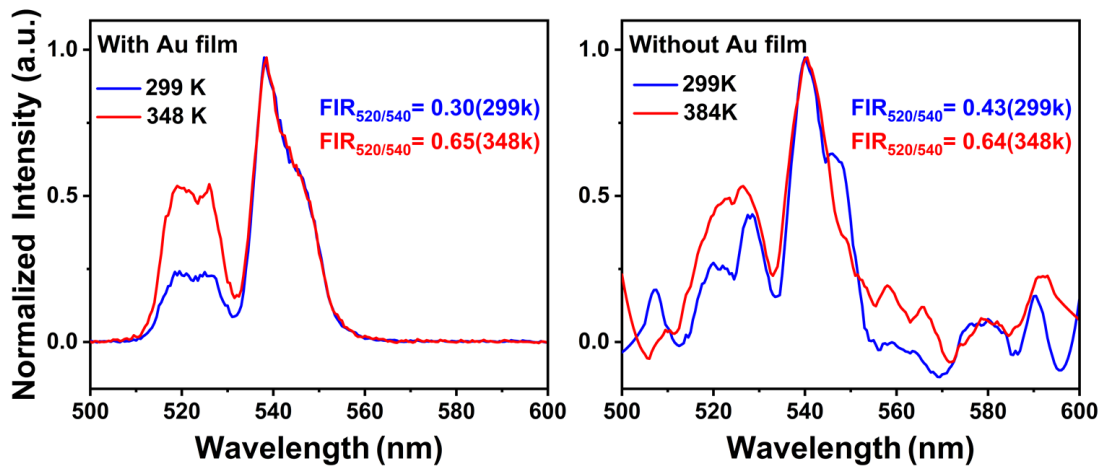

Fig. S13 Normalized spectra collected at the same temperatures (299 K and 348 K) for sensing system with and without Au.

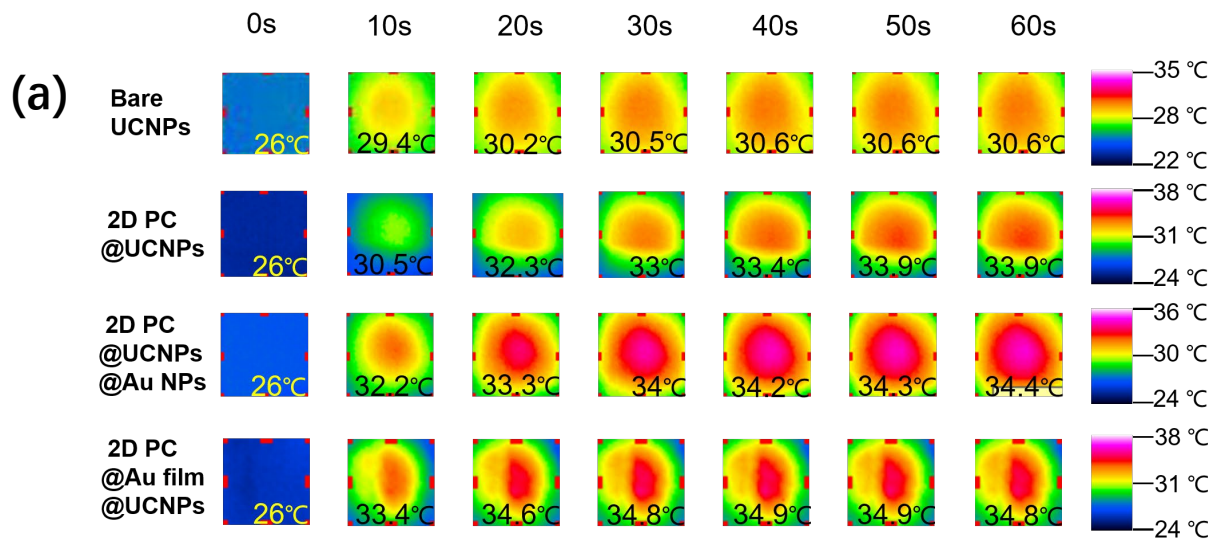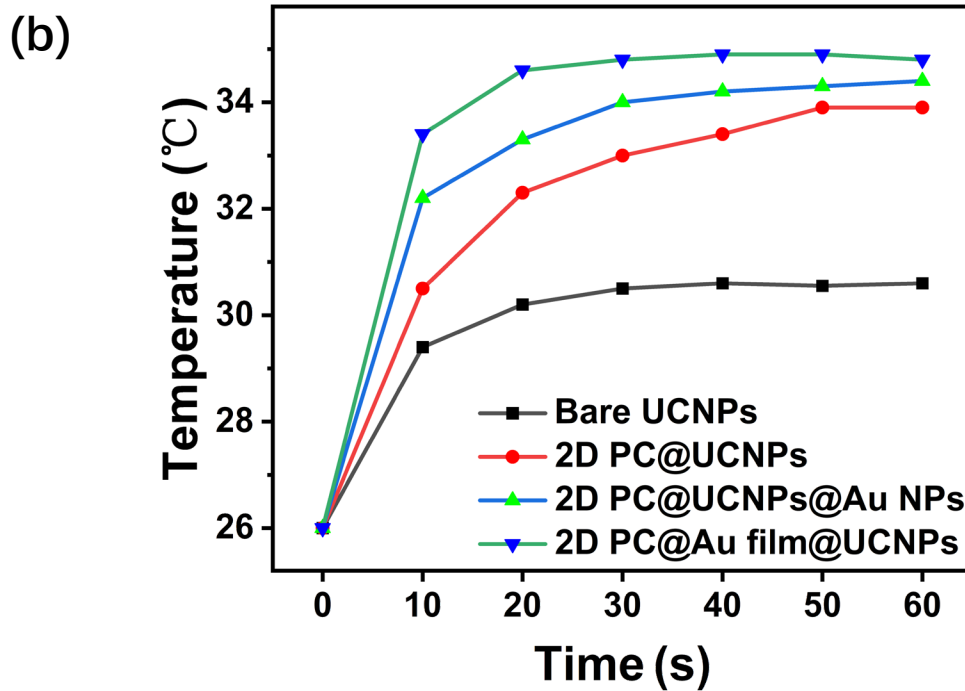

**Fig. S14** (a) Infrared thermal imagery of four structures based on  $1\mu\text{m}$  microspheres under  $980\text{ nm}$  laser irradiation with time. (b) Point diagram of maximum temperature change with time.



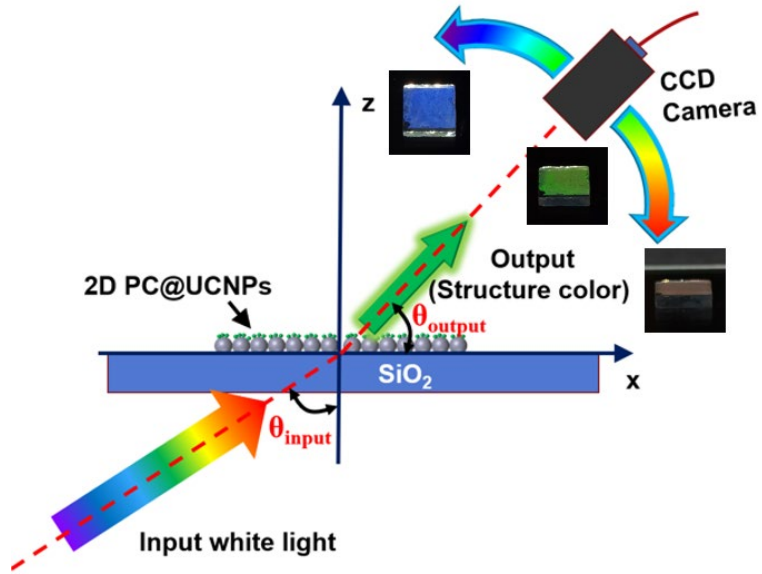

**Fig. S15** Schematic diagram of the structural color measurement.

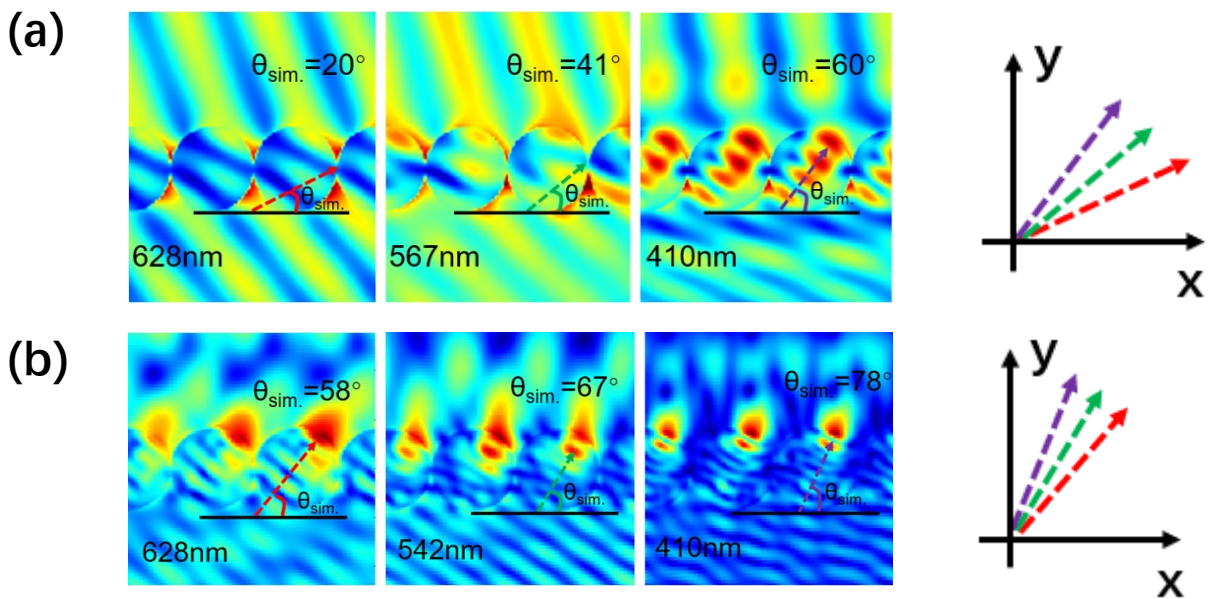

**Fig. S16** Structural color simulation diagrams of PS arrays with (a) 500 nm and (b) 1  $\mu$ m diameters.

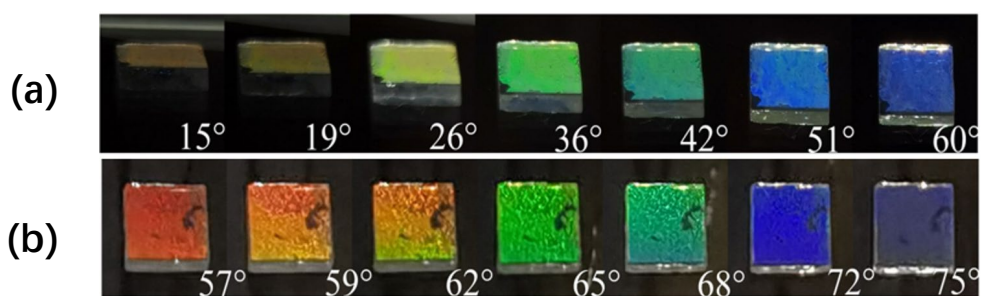

**Fig. S17** Structural colors of PS spheres arrays of different diameter (a) 500nm (b) 1 $\mu$ m, after coating with UCNPs.

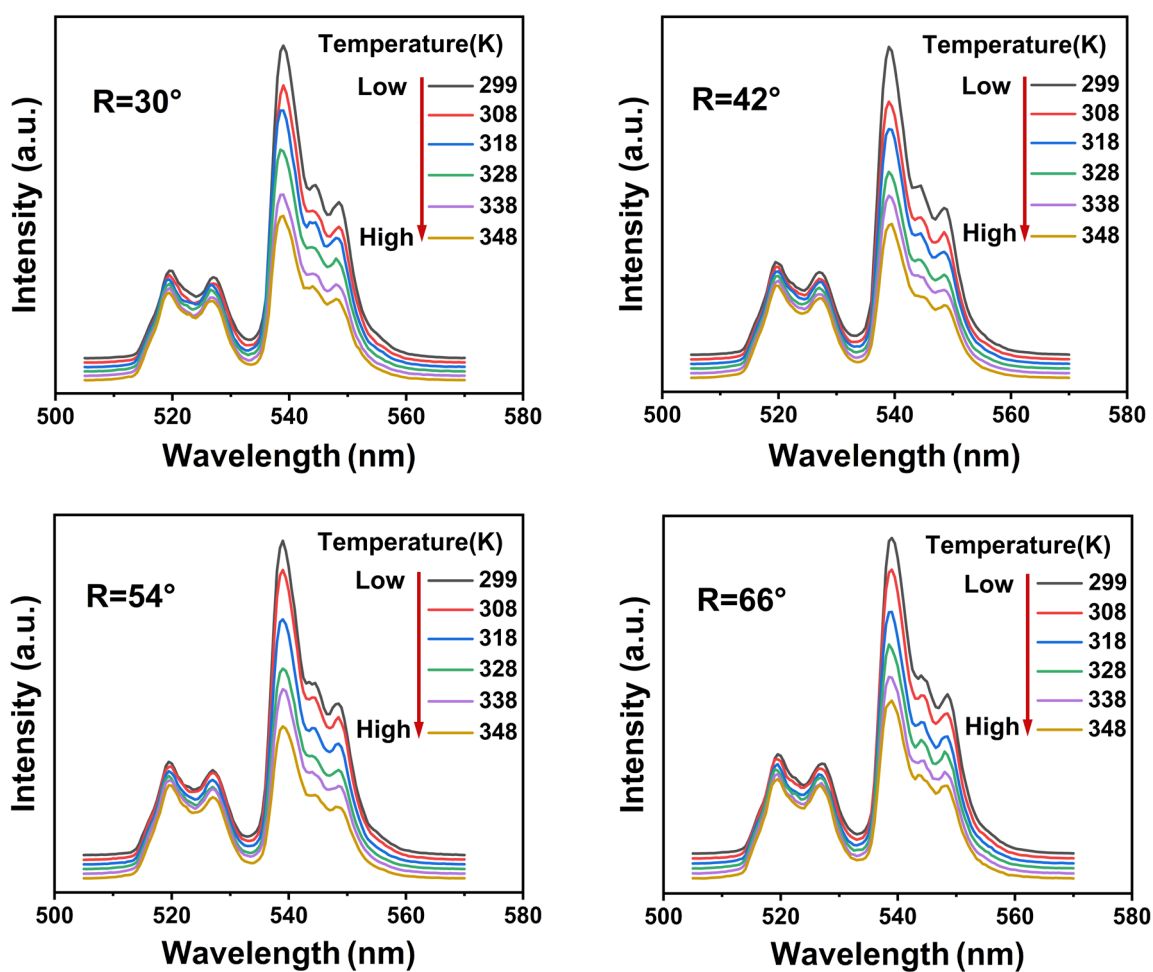

**Fig. S18** The thermal sensing performance of 2D PC@Au film@UCNPs ( $d=1\mu$ m), under 980nm excitation at various angle  $R=30^\circ, 42^\circ, 54^\circ$  and  $66^\circ$ .
